# Supplementary material for: Identification of KIAA1199 as a Biomarker for Pancreatic Intraepithelial Neoplasia
Source: PubMed Central journal article supplement (PMC5138641; doi:10.1038/srep38273), 2016-12-06
Supplement: srep38273-s1.pdf [file srep38273-s1.pdf]

# Identification of KIAA1199 as a Biomarker for Pancreatic Intraepithelial Neoplasia

Han Na Suh,<sup>1#</sup> Sohee Jun,<sup>1#</sup> Ah-Young Oh,<sup>2#</sup> Mrinal Srivastava,<sup>1</sup> Sunhye Lee,<sup>1</sup> Cullen M. Taniguchi,<sup>1</sup> Songlin Zhang,<sup>3</sup> Won Sup Lee,<sup>4</sup> Junjie Chen,<sup>1</sup> Bum-Joon Park,<sup>2</sup> and Jae-II Park<sup>1,5,6,\*</sup>

<sup>1</sup>Department of Experimental Radiation Oncology, The University of Texas MD Anderson Cancer Center, Houston, TX 77030, USA

<sup>2</sup>Department of Molecular Biology, Pusan National University, Busan, Republic of Korea

<sup>3</sup>Department of Pathology, The University of Texas Medical School, Houston, TX 77030, USA.

<sup>4</sup>Department of Internal Medicine, Gyeong-Sang National University Hospital, Jinju, Republic of Korea

<sup>5</sup>Graduate School of Biomedical Sciences at Houston, Houston, TX 77030, USA

<sup>6</sup>Program in Cancer Biology, The University of Texas MD Anderson Cancer Center, Houston, TX 77030, USA

<sup>#</sup>These authors equally contributed to this work.

\*Correspondence: Jae-II Park

## **SUPPLEMENTARY INFORMATION**

**Supplementary Figures 1, 2, and 3**

**Supplementary Data 1 and 2**

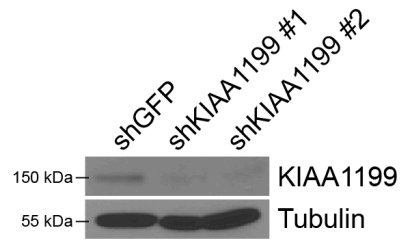

**Supplementary Figure 1. Expression of KIAA1199 in Panc-1**

Panc-1 was transfected with shGFP (negative control), shKIAA1199#1, or shKIAA1199#2 (endogenous depletion of specific for KIAA1199).

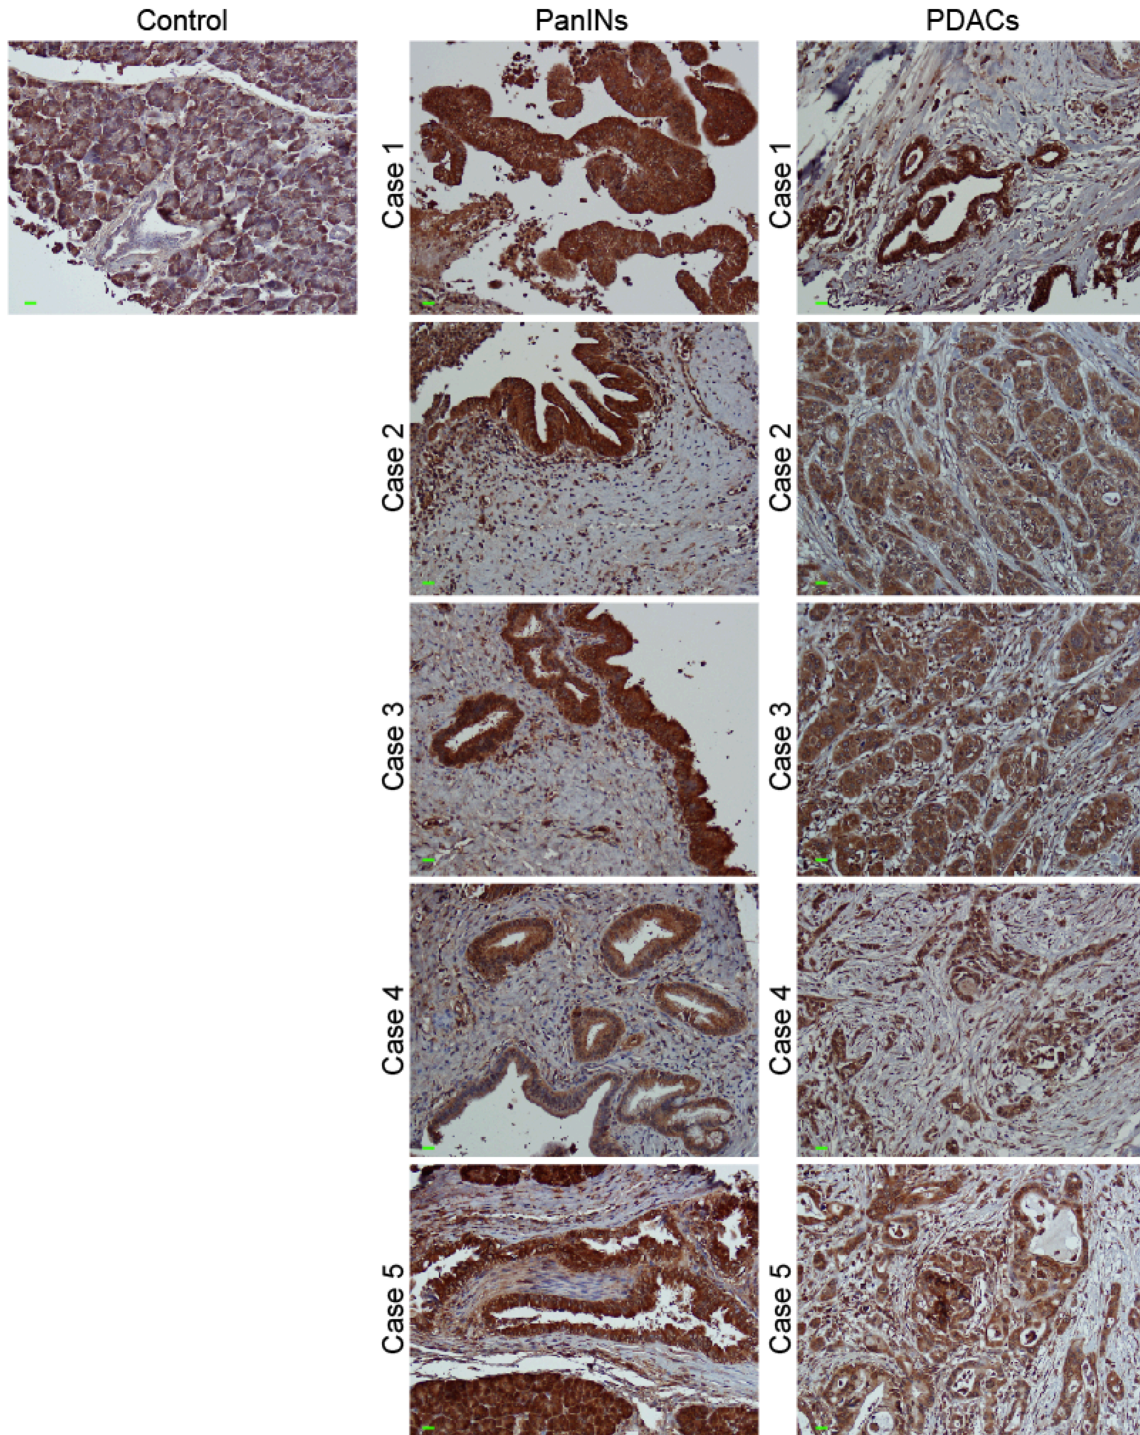

**Supplementary Figure 2. Expression of KIAA1199 in PanINs and PDACs**  
 TMA slides (BIC14011a and PA242b) were stained with KIAA1199 antibody (SantaCruz SC-164775, 1:25 dilution) and peroxidase-conjugated anti-rabbit 2<sup>nd</sup> antibody (Jackson ImmunoResearch, 1:200 dilution). DAB substrate was used for chromogenic detection. Scale bars= 20  $\mu$ m.

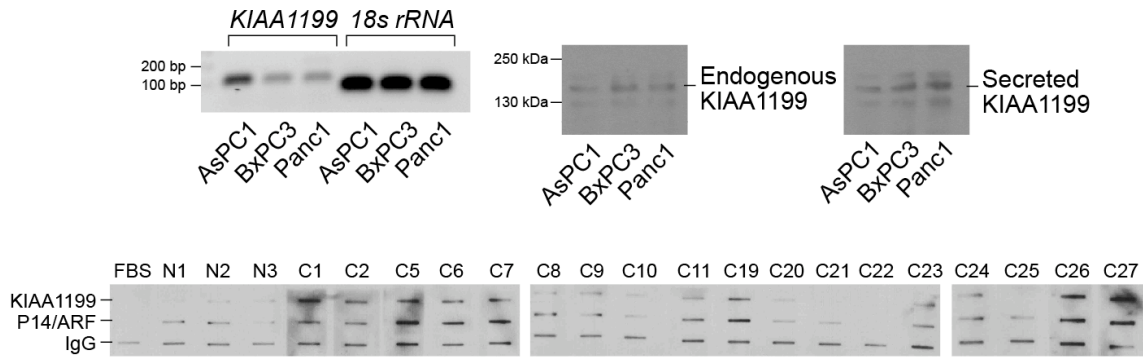

**Supplementary Figure 3. Full-length gels and blots**

Related images of Figure 2h-2j and Figure 5a

**Supplementary Data 1. Oncomine analysis**

List of two cDNA microarray datasets were analyzed using Oncomine (Gruntzmann [177 genes] and Pei [195 genes]). 21 genes were selected as the top 1% upregulated genes (fold change > 2; P < 0.0001).

**Supplementary Data 2. KIAA1199 expression scoring in PanINs and PDAC**

(Biomax TMA BIC14011a and PA242b). KIAA1199 expression intensity was scored (no expression: -; expression: +1~+3 from low to high expression).
